# Supplementary material for: Constructing a mesoporous carbon incorporated FeF3 nanocomposite cathode by one-step impregnation route for Li-ion battery applications
Source: Royal Society of Chemistry journal article supplement (doi:10.1039/d3nj03987k), 2023-01-01
Supplement: d3nj03987k1.pdf [file d3nj03987k1.pdf]

## Constructing Mesoporous Carbon Incorporated FeF<sub>3</sub> Nanocomposite Cathode by One-step Impregnation Route for Li-ion Battery Applications

Kesavan Thangaiyan<sup>1,2\*</sup> and Yuvashri Jayamkondan<sup>2</sup>

<sup>1</sup>*Department of Materials Science and Engineering, Norwegian University of Science and Technology, Trondheim 7491, Norway*

<sup>2</sup>*Department of Chemistry, SRM Institute of Science and Technology, Chennai 603203, Tamil Nadu, India*

Corresponding author: [kesavan.thangaiyan@ntnu.no](mailto:kesavan.thangaiyan@ntnu.no)

**Table S1.** List of literature based on carbon composite with FeF<sub>3</sub> cathode for LIBs.

| S.No.     | Material                                | Capacity (mAh g <sup>-1</sup> ) | C-Rate | Voltage (V)      | Cycle Number | Ref.             |
|-----------|-----------------------------------------|---------------------------------|--------|------------------|--------------|------------------|
| 1.        | FeF <sub>3</sub> @CMK composite         | 190                             | 0.1 C  | 2.0-4.5 V        | 60           | 1                |
| 2.        | FeF <sub>3</sub> /graphene              | 234                             | 0.1 C  | 2.0-4.5 V        | 60           | 2                |
| 3.        | FeF <sub>3</sub> /ACMB composite        | 112                             | 0.5 C  | 2.0-4.5 V        | 50           | 3                |
| 4.        | FeF <sub>3</sub> /OMC                   | 162                             | 0.1 C  | 2.0-4.5 V        | 30           | 4                |
| <b>5.</b> | <b>FeF<sub>3</sub>/MC nanocomposite</b> | <b>182</b>                      | 0.1 C  | <b>2.0-4.5 V</b> | <b>60</b>    | <b>This work</b> |

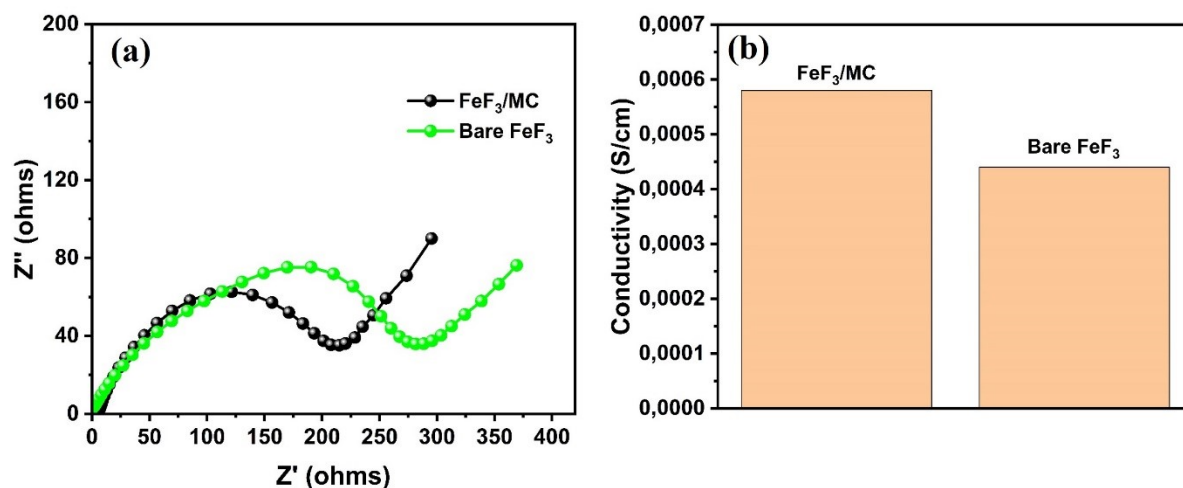

**Figure S1: (a) Nyquist plots for FeF<sub>3</sub>/MC and Bare FeF<sub>3</sub>, and (b) Calculated electrical conductivity using EIS data.**

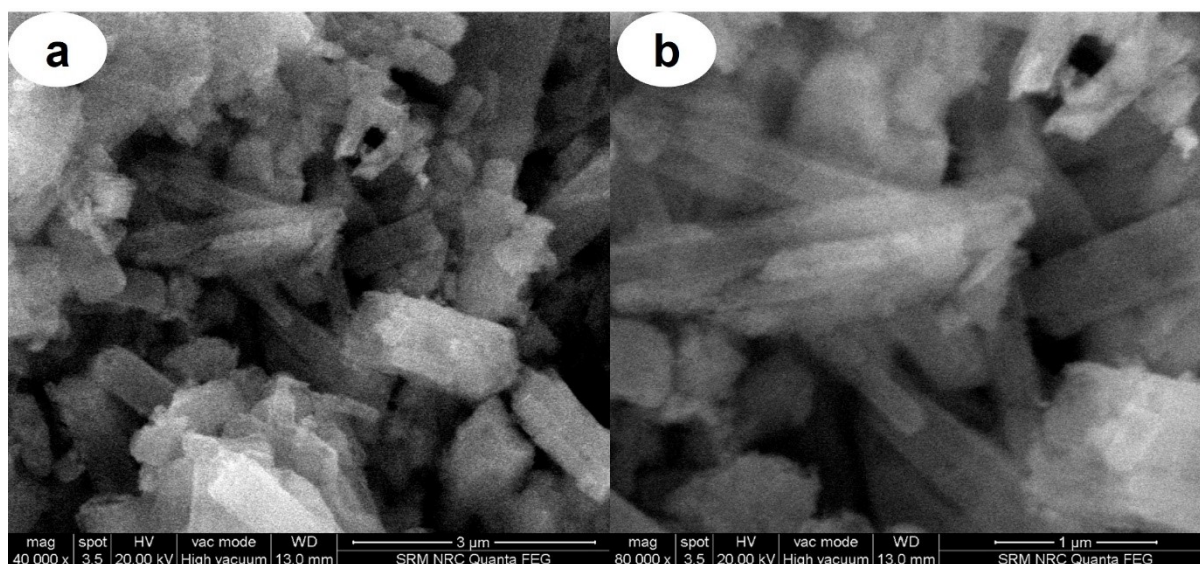

**Figure S2: SEM images of FeF<sub>3</sub>/MC after cycling.**

### References:

- [1] P. R. Ilango, K. Prasanna, S. J. Do, Y. N. Jo and C. W. Lee, *Sci. Rep.*, 2016, **6**, 2–10.
- [2] T. Bao, H. Zhong, H. Zheng, H. Zhan and Y. Zhou, *Electrochim. Acta*, 2015, **176**, 215–221.
- [3] L. Liu, M. Zhou, X. Wang, Z. Yang, F. Tian and X. Wang, *J. Mater. Sci.*, 2012, **47**, 1819–1824.
- [4] H. Jung, J. Shin, C. Chae, J. K. Lee and J. Kim, *J. Phys. Chem. C*, 2013, **117**, 14939–14946.
